# Supplementary material for: Migration, acculturation, and the maintenance of between-group cultural variation
Source: PubMed Central journal article supplement (PMC6191118; doi:10.1371/journal.pone.0205573), 2018-10-16
Supplement: pone.0205573.s004.pdf [file pone.0205573.s004.pdf]

Supporting Information for ‘Migration, acculturation,  
and the maintenance of between-group cultural  
variation’

*Alex Mesoudi* \*

---

\*Human Behaviour and Cultural Evolution Group, Biosciences, University of Exeter, Penryn, Cornwall TR10 9FE, United Kingdom; a.mesoudi@exeter.ac.uk

# S1 Results

## Individual-based version of Model 1

In order to verify the recursion-based models that track trait frequencies, I created analogous individual-based models in which individuals and their traits are explicitly simulated. These individual-based models have the same assumption of  $s$  sub-populations and  $s$  traits. Now, however, we specify the number of individuals in each sub-population,  $N$ . This is different to  $n$ , which is the number of demonstrators sampled during conformist acculturation.  $n$  is also implemented in the individual-based models, so individuals pick  $n$  demonstrators from the  $N$  members of their sub-population (so  $n \leq N$ ). The individual-based simulations start with the same complete between-group structure as the recursion models, i.e. all  $N$  individuals in sub-population 1 have trait 1, all  $N$  individuals in sub-population 2 have trait 2, etc.  $F_{ST}$  is calculated in the same way as for the recursion-based model after calculating overall trait frequencies from individuals' traits. Migration occurs in the same way as the island model. Every time-step, each individual moves to a common migrant pool with probability  $m$ , and then randomly disperses across the newly vacant spots ignoring sub-population structure. Conformist acculturation is implemented slightly differently. Following all migration, each individual chooses  $n$  demonstrators from within their sub-population, and with probability  $a$  adopts the most common trait among those  $n$  demonstrators. Otherwise they retain their existing trait. This is conceptually the same as the recursion-based conformity described above, but without the multinomial theorem implementation, thus providing a conceptual replication of conformity as implemented in the main text. For each of the  $n$  chosen demonstrators, with probability  $1 - r$  that demonstrator is chosen randomly from the focal individual's sub-population. With probability  $r$  that demonstrator has the same trait as the focal individual. Consequently, when assortment parameter  $r = 1$ , then individuals only ever learn from demonstrators with the same trait as themselves. Parameter definitions for the individual-based model are given in S3 Table. Full code of all models is available in <https://github.com/amesoudi/migrationmodels>.

**S3 Table: Parameter definitions for Model 1 individual-based simulations**

---

| Parameter | Definition                                                                                                                                                                                                                                                                          |
|-----------|-------------------------------------------------------------------------------------------------------------------------------------------------------------------------------------------------------------------------------------------------------------------------------------|
| $s$       | The number of sub-populations, and also the number of alternative cultural trait values                                                                                                                                                                                             |
| $m$       | Migration rate: the probability in one time-step that an individual moves to a randomly chosen sub-population (equivalently, the proportion of the population that moves in one time-step)                                                                                          |
| $n$       | The number of demonstrators from whom individuals learn during acculturation                                                                                                                                                                                                        |
| $a$       | Acculturation rate: the probability that an individual adopts the most-common trait among $n$ demonstrators chosen from their sub-population, as opposed to retaining their existing trait. When $a = 1$ , there is 100% chance of copying the most-common trait (if there is one). |
| $N$       | The number of individuals in each sub-population (giving $Ns$ individuals in the entire population)                                                                                                                                                                                 |
| $r$       | The probability that a demonstrator is chosen who has the same trait as the focal individual, rather than chosen at random.                                                                                                                                                         |

---

S8, S9 and S10 Figs show the individual-based model results equivalent to the recursion-based model results shown in Figs 1, 2 and 3 respectively. There is very little difference between the two models, despite their different implementation, increasing our confidence in the robustness of the conclusions. There is a slight tendency for  $F_{ST}$  to be lower in the individual-based model than the recursion-based model, especially when diversity is low (e.g.  $a = 0.6$  in S8 Fig C). This may be due to drift which operates only in the finite populations of the individual-based models. If a trait is lost due to drift, then diversity will be reduced. S11 Fig repeats Fig 2 and S10 Fig but with larger  $n$  than is computationally feasible with the recursion-based model. Here we can see that increasing  $n$  above 13 does not change the dynamics, except at very low values of  $a$  when migration is very high (S11 Fig C).

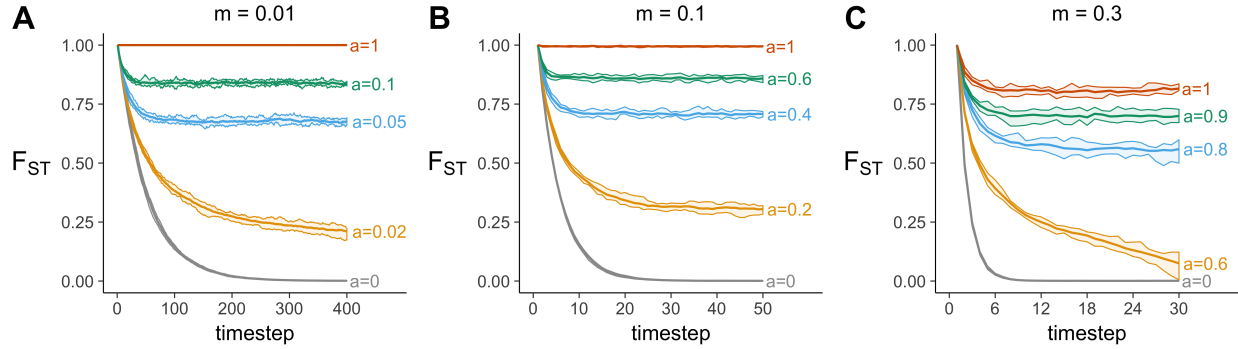

**S8 Fig:** Time series showing changes in  $F_{ST}$  over time for (A) a low migration rate  $m=0.01$ , (B) a moderate migration rate  $m=0.1$ , and (C) a high migration rate  $m=0.3$ , at varying strengths of acculturation,  $a$ , in the individual-based model. Other parameters:  $s=5$ ,  $n=5$ ,  $N=1000$ ; results are the average of 10 independent simulation runs.

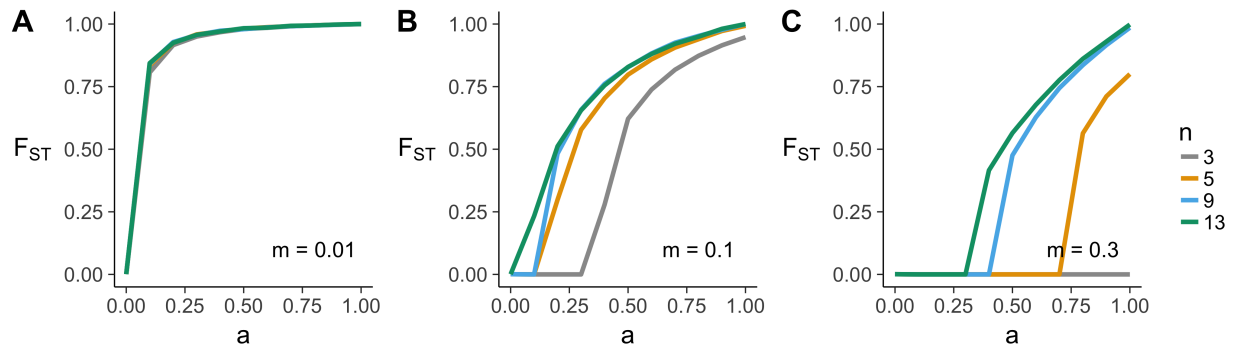

**S9 Fig:** The relationship between  $a$  and  $F_{ST}$  at three different migration rates, and different values of  $n$ , for the individual-based model. Other parameters:  $s=5$ , 500 timesteps,  $N=1000$ ; results are the average of 10 independent simulation runs.

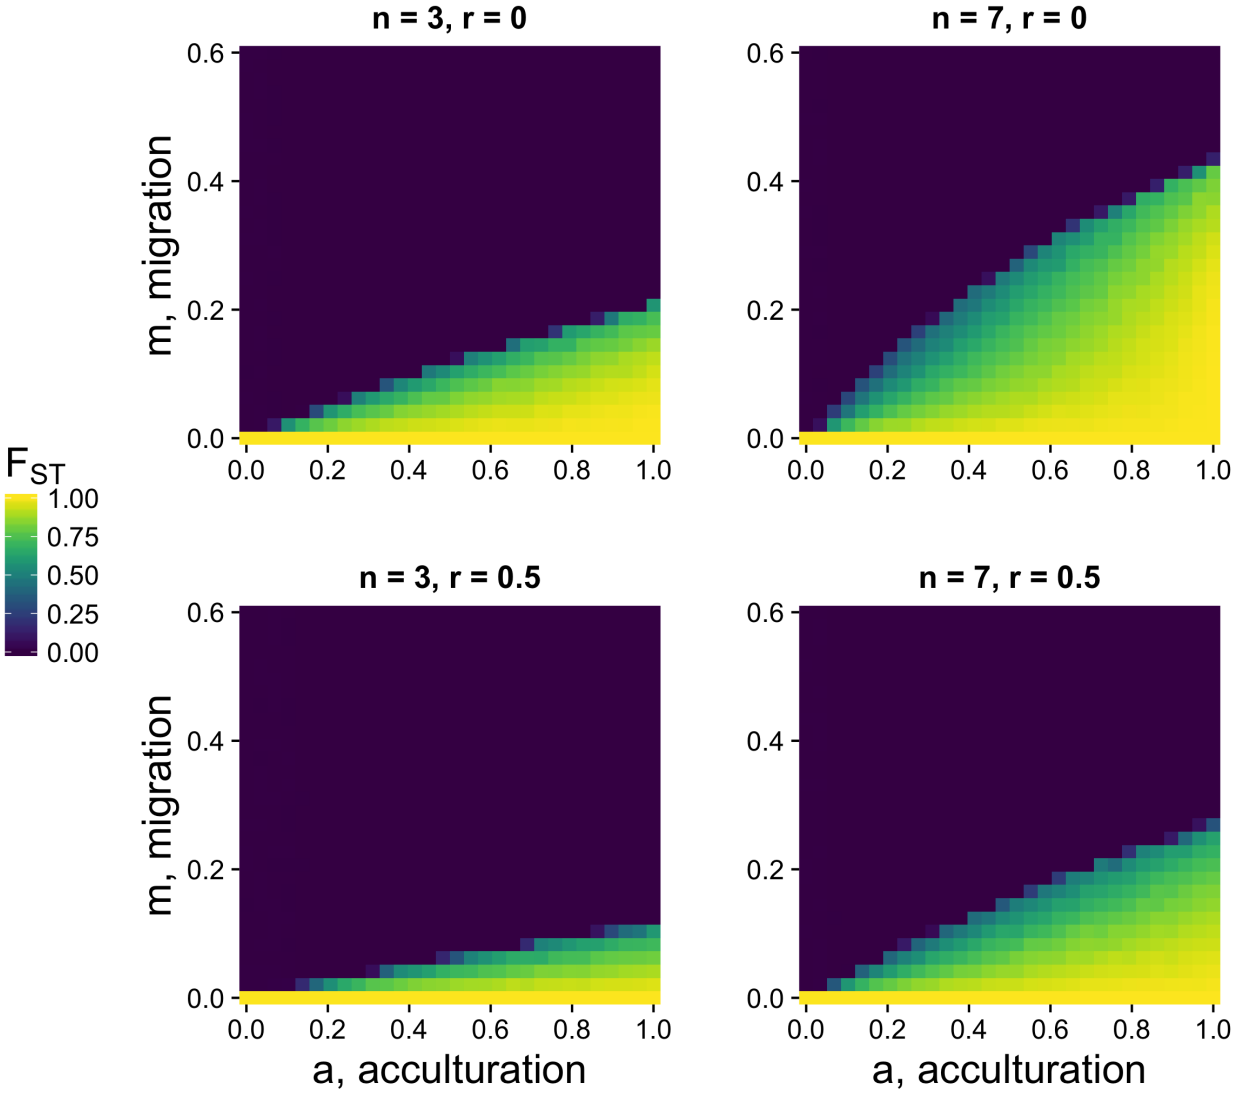

S10 Fig: Heatmap showing  $F_{ST}$  for varying acculturation rates,  $a$ , and migration rates,  $m$ , separately for three different values of  $n$ , the number of demonstrators, for the individual-based model. Other parameters:  $s=5$ ,  $N=1000$ , 500 timesteps; results are the average of 10 independent simulation runs.

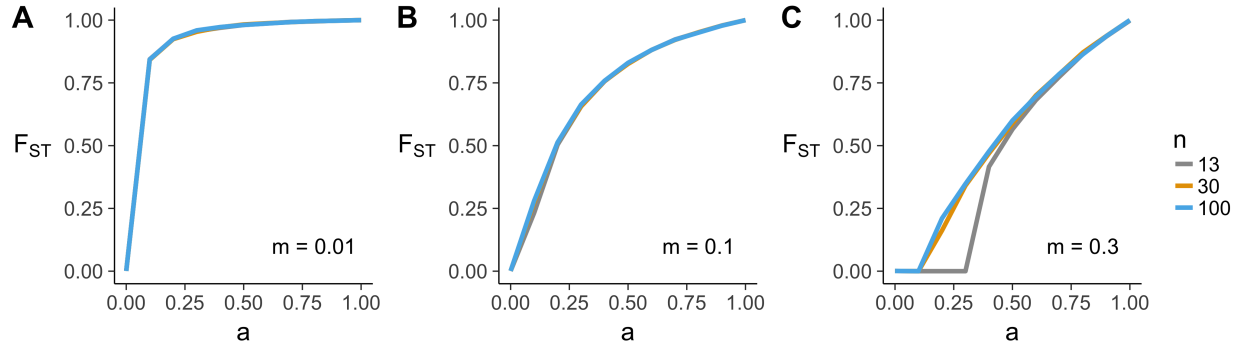

**S11 Fig:** The relationship between  $a$  and  $F_{ST}$  at three different migration rates, for three large values of  $n$ , for the individual-based model. Other parameters:  $s=5$ , 500 timesteps,  $N=1000$ ; results are the average of 10 independent simulation runs.
